# Supplementary material for: Dual inhibition of acetylcholinesterase and β-secretase by metabolites from Echinocactus grusonii Hildm.: in silico and in vitro investigations
Source: Royal Society of Chemistry journal article supplement (doi:10.1039/d5ra07497e), 2025-01-01
Supplement: d5ra07497e1.pdf [file d5ra07497e1.pdf]

## Dual Inhibition of Acetylcholinesterase and $\beta$ -Secretase by Metabolites from *Echinocactus grusonii*

### Hildm.: *In Silico* and *In Vitro* Investigations

Ahmed A. Heraiz<sup>1\*</sup>, Ahmed Othman<sup>1\*</sup>, Ahmed M. Sayed<sup>2</sup>, Mostafa M. Hegazy<sup>1</sup>, Abd El-Salam I.

Mohammed<sup>1</sup>, and Atef A. Elhela<sup>1</sup>

<sup>1</sup>Department of Pharmacognosy and Medicinal Plants, Faculty of Pharmacy, Al-Azhar University, Cairo, 11884, Egypt

<sup>2</sup>Department of Pharmacognosy, Faculty of Pharmacy, Almaaqal University, Basrah, Iraq

#### \* Correspondence:

Ahmed A. Heraiz; [ahmedheraiz@gmail.com](mailto:ahmedheraiz@gmail.com); [ahmedheraiz.2@azhar.edu.eg](mailto:ahmedheraiz.2@azhar.edu.eg); <https://orcid.org/0000-0002-4829-9860>

Ahmed Othman; [ah.othman@azhar.edu.eg](mailto:ah.othman@azhar.edu.eg); <https://orcid.org/0000-0002-2827-7621>

#### Abstract

Targeting acetylcholinesterase (AChE) and  $\beta$ -secretase (BACE-1) is a promising multi-faceted approach for treating neurological disorders. In our study, the chemical investigation of *Echinocactus grusonii* Hildm. (Cactaceae) led to the isolation and identification of seven compounds, including three flavonoids, naringenin **1**, kaempferol **2**, and isokaempferide **3**, one megastigmane glycoside, vomifoliol-9-*O*- $\beta$ -D-glucopyranoside **4**, and three alkaloids, *N*-chloromethyl hordenine **5**, *N*-acetyl hordenine **6**, and *N*-acetyl-*N*-chloromethyl-*N*-methyl tyramine **7**. Compounds **5** and **7** were identified as previously undescribed halogenated alkaloids. Biological evaluation revealed that all compounds exhibited promising acetylcholinesterase inhibitory activity ( $IC_{50}$  = 0.076–2.255  $\mu$ g/mL), as well as significant inhibition of  $\beta$ -secretase (BACE1) with  $IC_{50}$  values ranging from 0.066 to 7.189  $\mu$ g/mL. Docking, molecular dynamics, and binding energy calculations suggested that compounds **4** and **5** are promising AChE inhibitors, while compounds **3**, **4**, and **7** are leading candidates against BACE1. Collectively, this study underscores the potential of *Echinocactus grusonii* as a rich source of bioactive lead compounds for developing novel therapeutics for pharmaceutical applications.

**Keywords:** Cactaceae, Halogenated alkaloids, Hordenine derivatives, Anti-Alzheimer compounds, Anti-cholinesterase activity, Anti-BACE1 activity

## List of Figures

|                                                                     |    |
|---------------------------------------------------------------------|----|
| <b>Figure S1:</b> HR-MS spectrum of compound 1 .....                | 3  |
| <b>Figure S2:</b> $^1\text{H}$ NMR spectrum of compound 1 .....     | 3  |
| <b>Figure S3:</b> APT NMR spectrum of compound 1 .....              | 4  |
| <b>Figure S4:</b> HR-MS spectrum of compound 2 .....                | 4  |
| <b>Figure S5:</b> $^1\text{H}$ NMR spectrum of compound 2 .....     | 5  |
| <b>Figure S6:</b> APT NMR spectrum of compound 2 .....              | 5  |
| <b>Figure S7:</b> HR-MS spectrum of compound 3 .....                | 6  |
| <b>Figure S8:</b> $^1\text{H}$ NMR spectrum of compound 3 .....     | 6  |
| <b>Figure S9:</b> APT NMR spectrum of compound 3 .....              | 7  |
| <b>Figure S10:</b> ESI-MS spectrum of compound 4 .....              | 7  |
| <b>Figure S11:</b> $^1\text{H}$ NMR spectrum of compound 4 .....    | 8  |
| <b>Figure S12:</b> APT NMR spectrum of compound 4 .....             | 8  |
| <b>Figure S13:</b> HR-MS spectrum of compound 5 .....               | 9  |
| <b>Figure S14:</b> $^1\text{H}$ NMR spectrum of compound 5 .....    | 9  |
| <b>Figure S15:</b> $^{13}\text{C}$ NMR spectrum of compound 5 ..... | 10 |
| <b>Figure S16:</b> HSQC spectrum of compound 5 .....                | 10 |
| <b>Figure S17:</b> HMBC spectrum of compound 5 .....                | 11 |
| <b>Figure S18:</b> COSY spectrum of compound 5 .....                | 11 |
| <b>Figure S19:</b> HR-MS spectrum of compound 6 .....               | 12 |
| <b>Figure S20:</b> $^1\text{H}$ NMR spectrum of compound 6 .....    | 12 |
| <b>Figure S21:</b> APT spectrum of compound 6 .....                 | 13 |
| <b>Figure S22:</b> HSQC spectrum of compound 6 .....                | 13 |
| <b>Figure S23:</b> HMBC spectrum of compound 6 .....                | 14 |
| <b>Figure S24:</b> HR-MS spectrum of compound 7 .....               | 14 |
| <b>Figure S25:</b> $^1\text{H}$ NMR spectrum of compound 7 .....    | 15 |
| <b>Figure S26:</b> $^{13}\text{C}$ NMR spectrum of compound 7 ..... | 15 |
| <b>Figure S27:</b> HSQC spectrum of compound 7 .....                | 16 |
| <b>Figure S28:</b> HMBC spectrum of compound 7 .....                | 17 |
| <b>Figure S29:</b> COSY spectrum of compound 7 .....                | 17 |

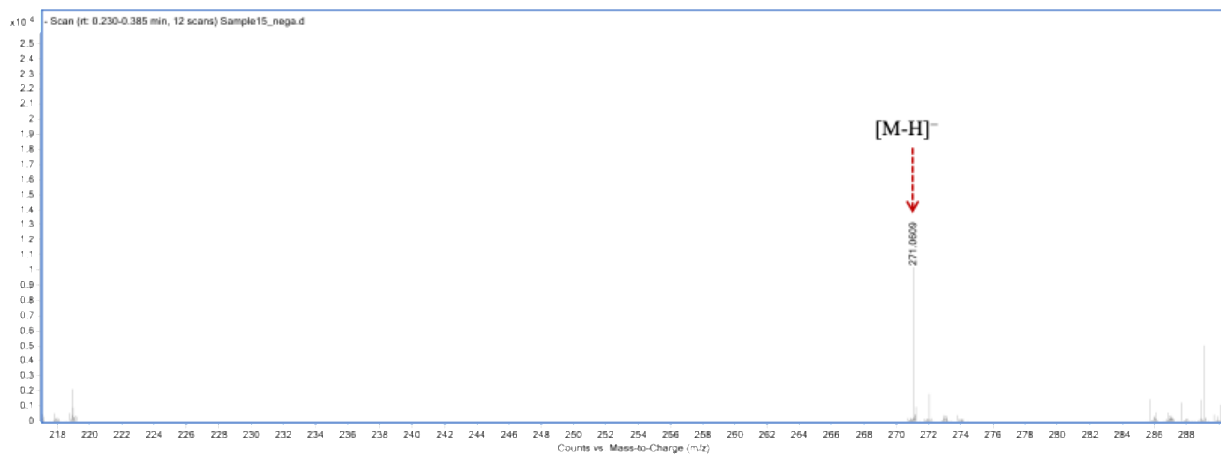

**Figure S1:** HR-MS spectrum of compound 1

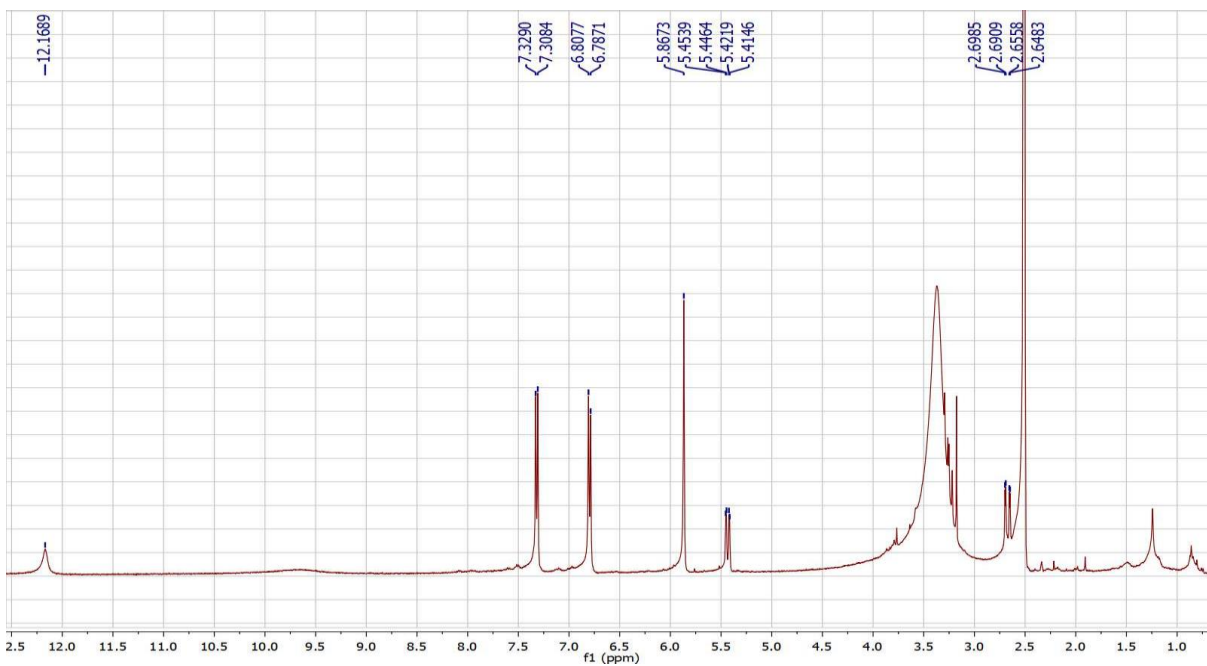

**Figure S2:** <sup>1</sup>H NMR spectrum of compound 1

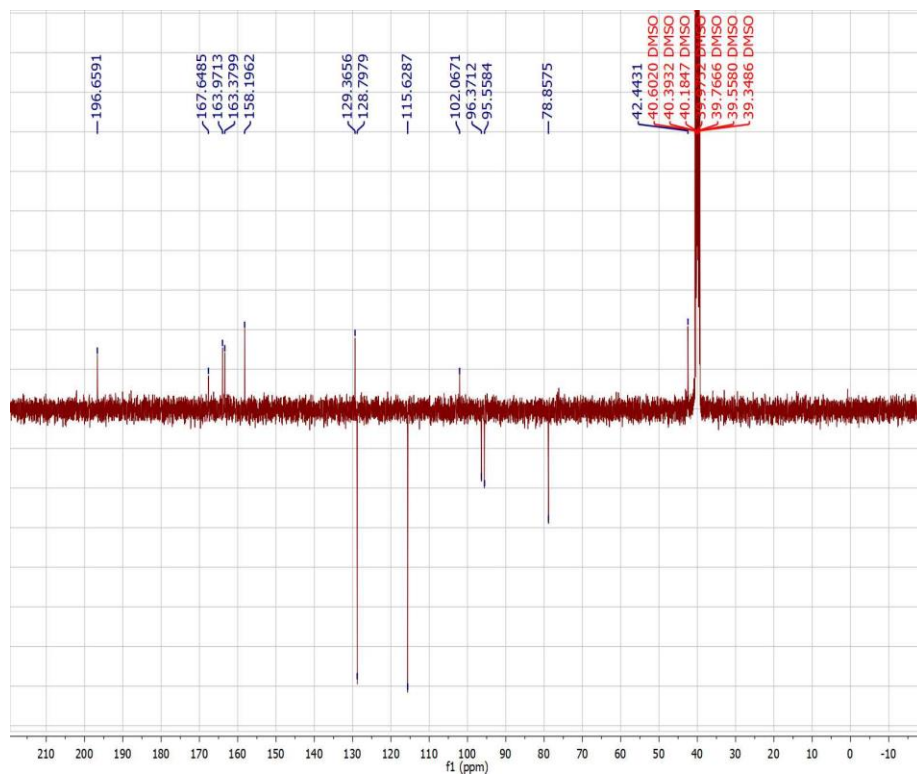

**Figure S3:** APT NMR spectrum of compound 1

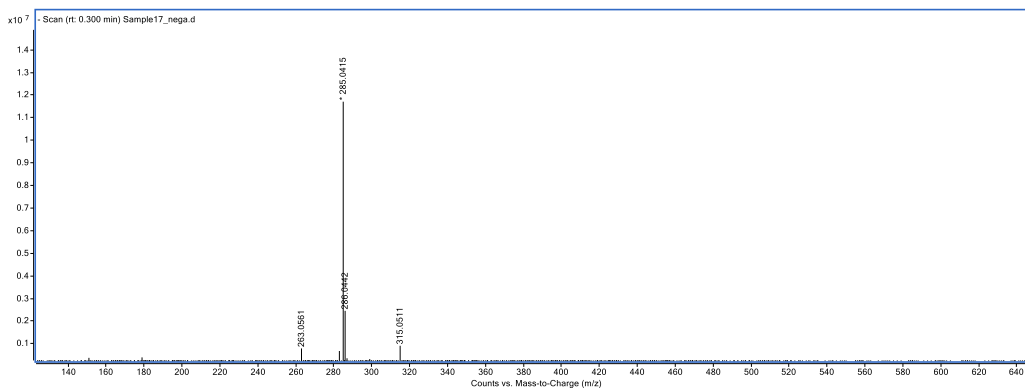

**Figure S4:** HR-MS spectrum of compound 2

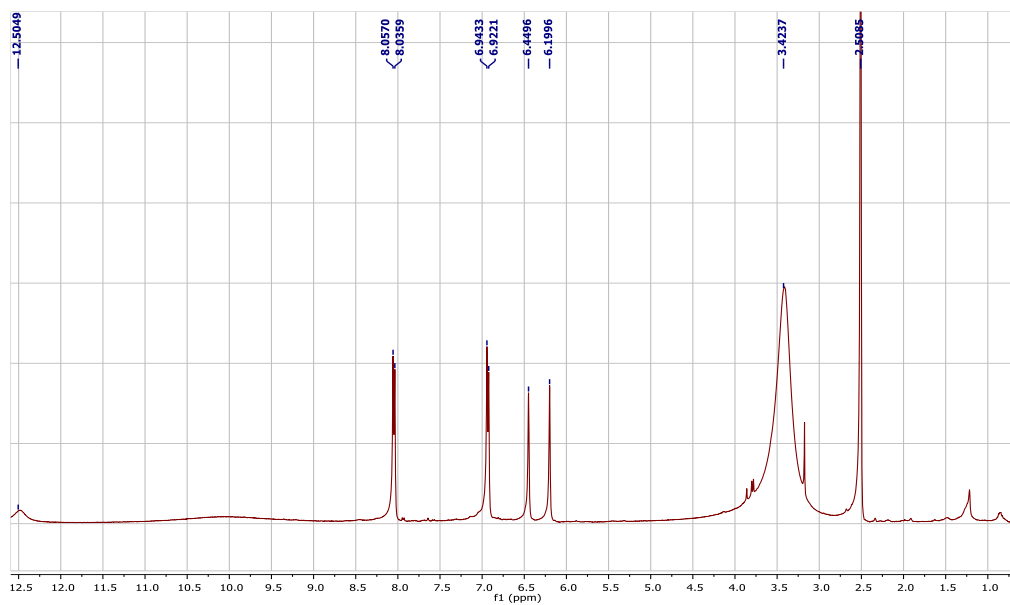

**Figure S5:** <sup>1</sup>H NMR spectrum of compound 2

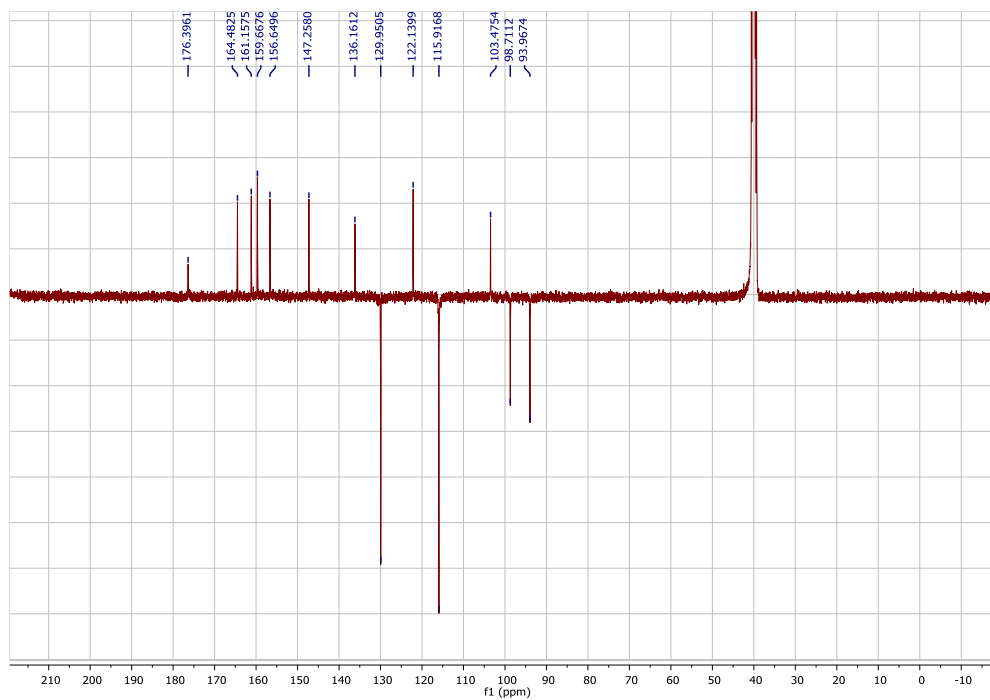

**Figure S6:** APT NMR spectrum of compound 2

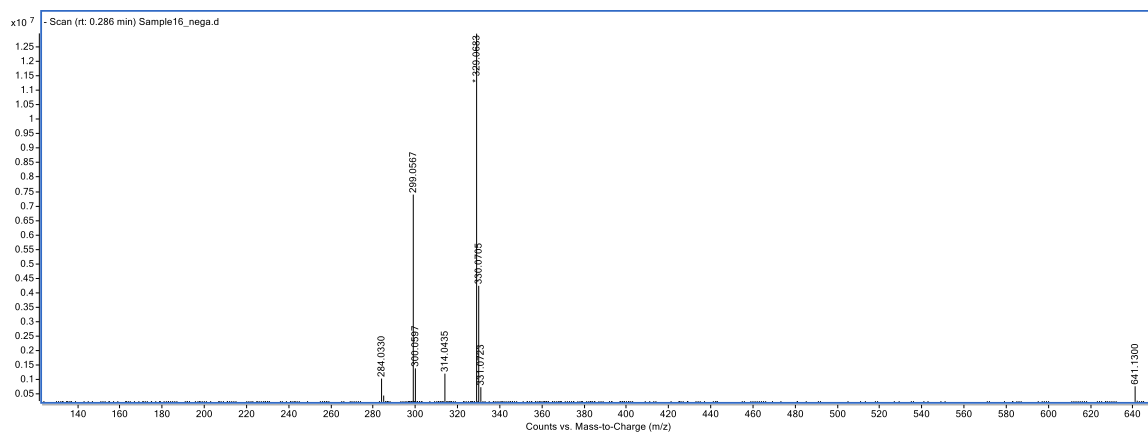

**Figure S7:** HR-MS spectrum of compound 3

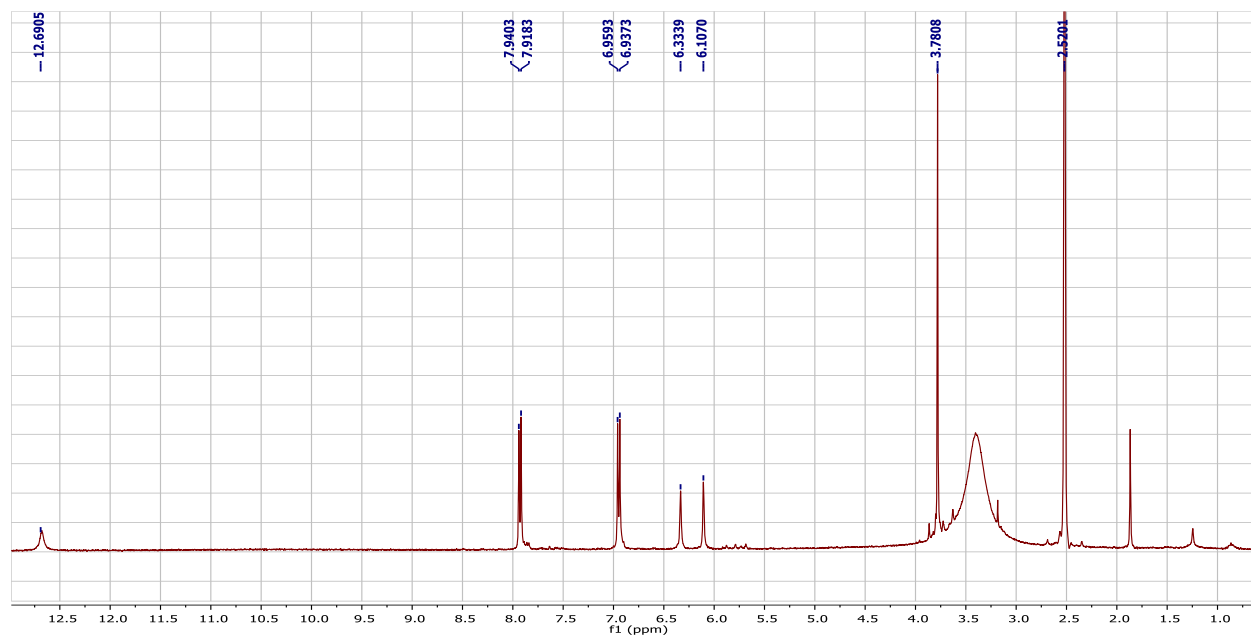

**Figure S8:** <sup>1</sup>H NMR spectrum of compound 3

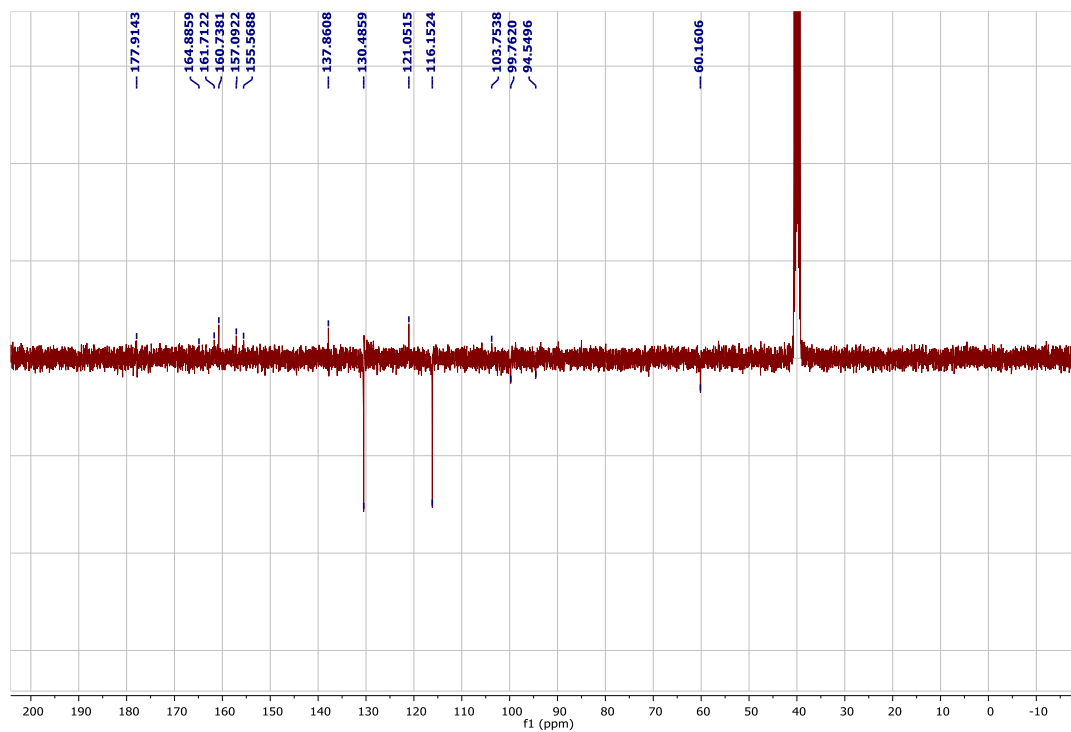

**Figure S9:** APT NMR spectrum of compound 3

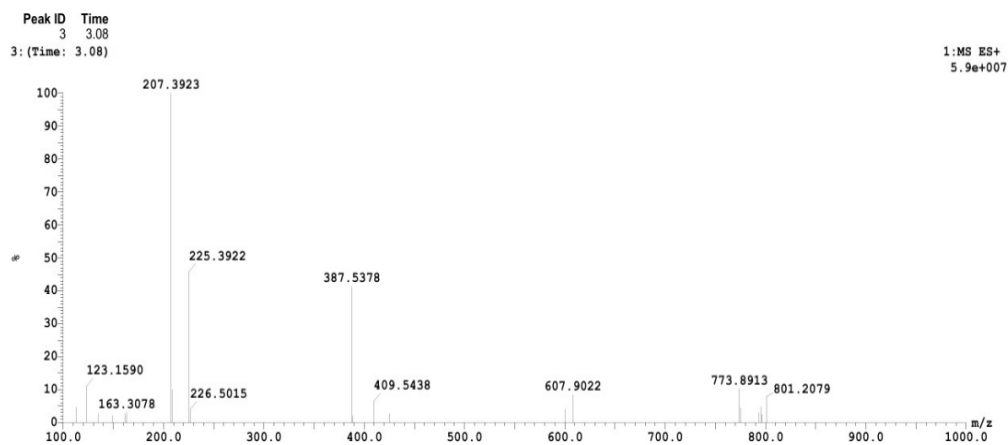

**Figure S10:** ESI-MS spectrum of compound 4

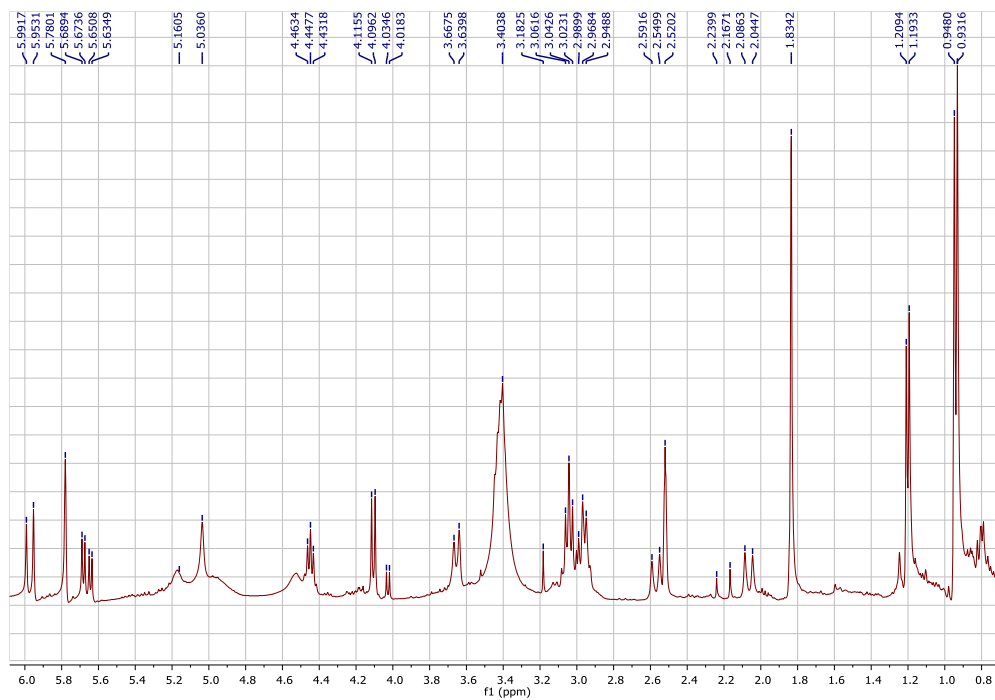

**Figure S11:** <sup>1</sup>H NMR spectrum of compound 4

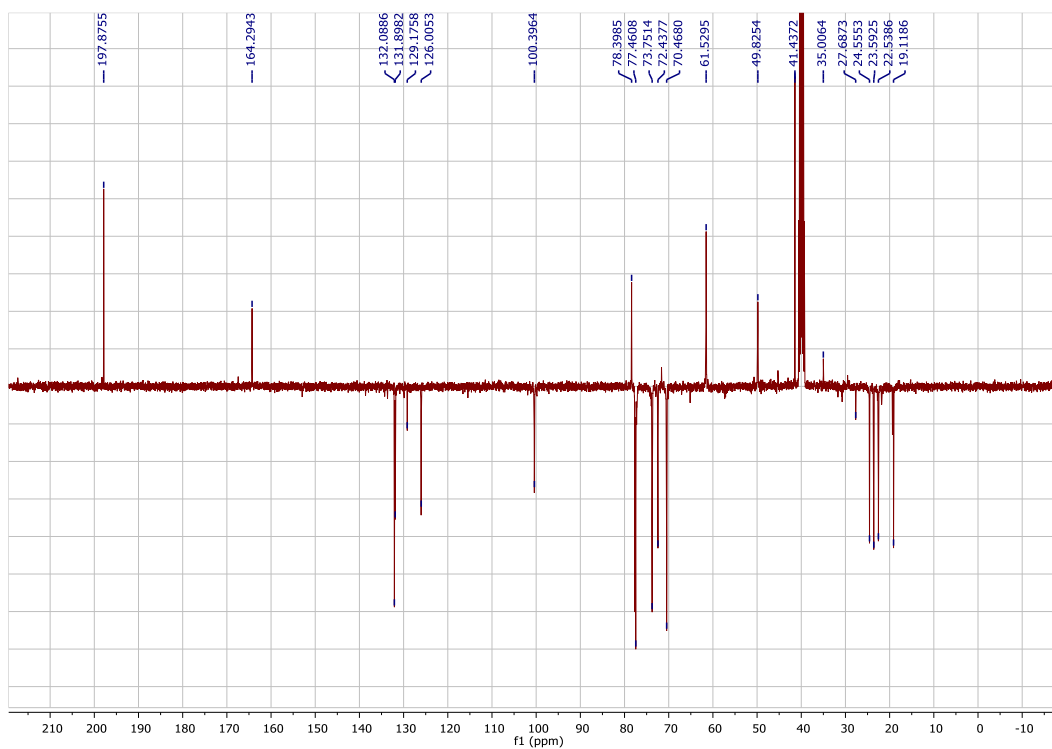

**Figure S12:** APT NMR spectrum of compound 4



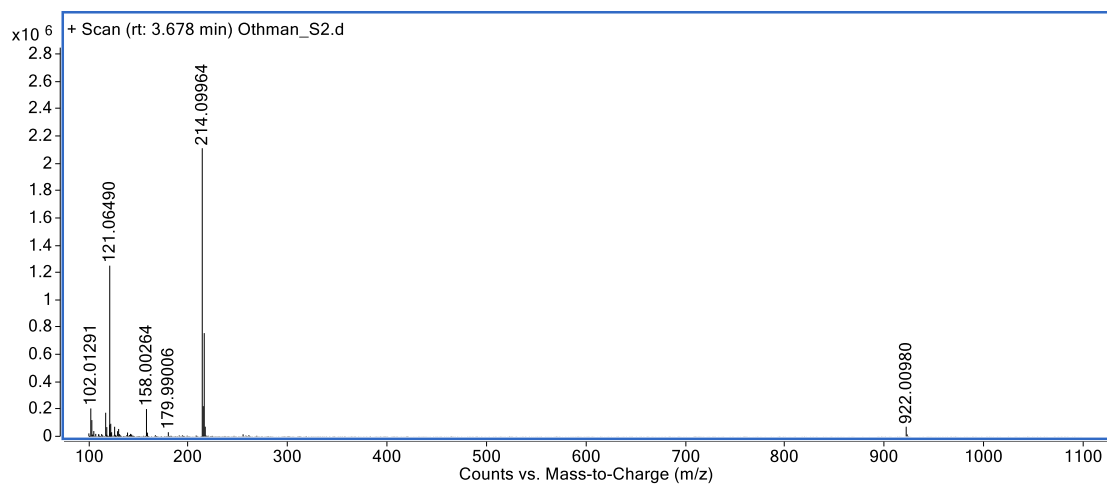

**Figure S13:** HR-MS spectrum of compound 5

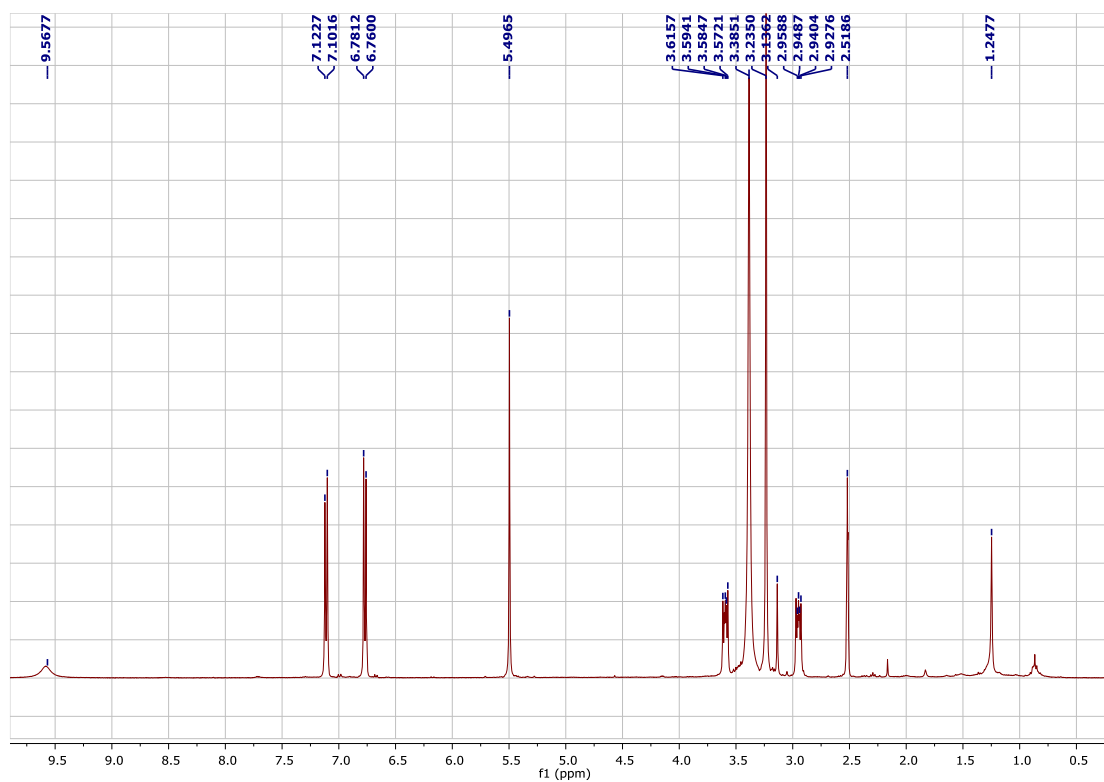

**Figure S14:** <sup>1</sup>H NMR spectrum of compound 5

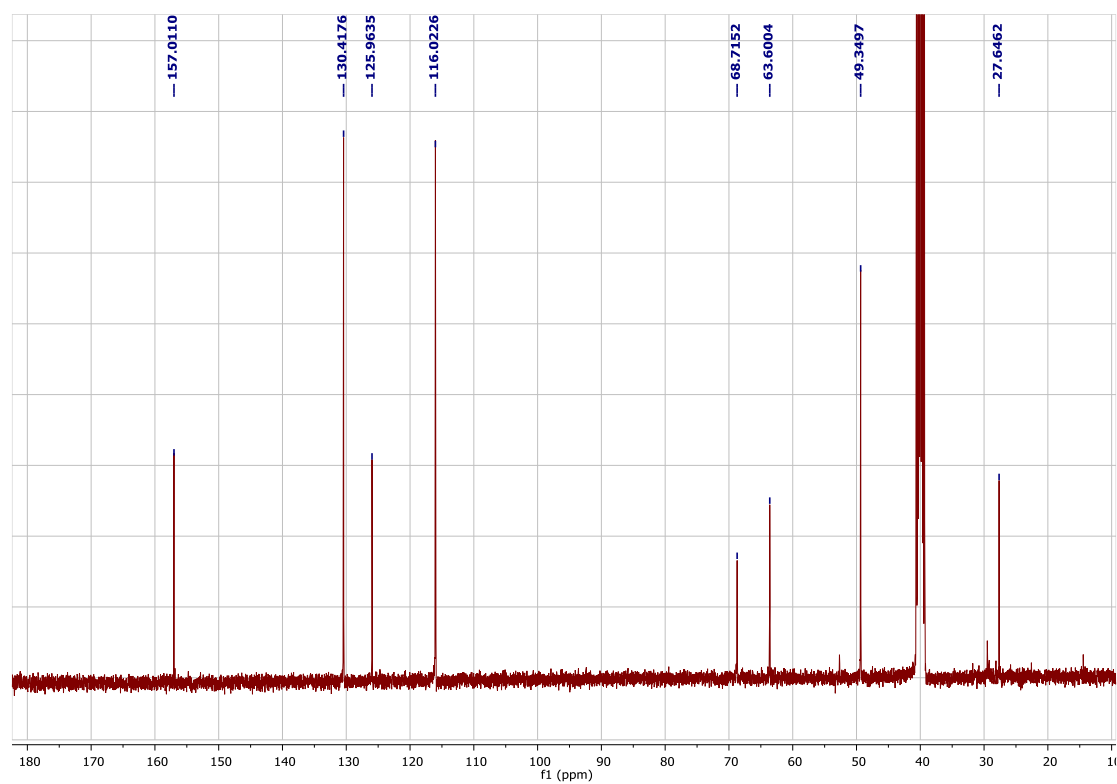

**Figure S15:** <sup>13</sup>C NMR spectrum of compound 5

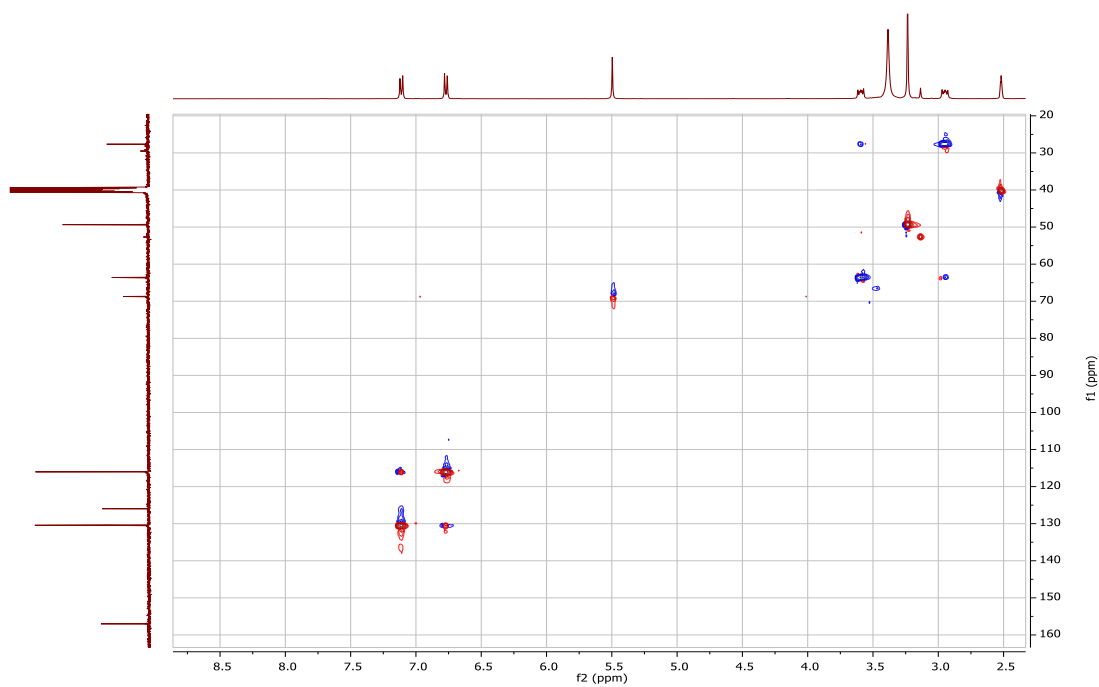

**Figure S16:** HSQC spectrum of compound 5

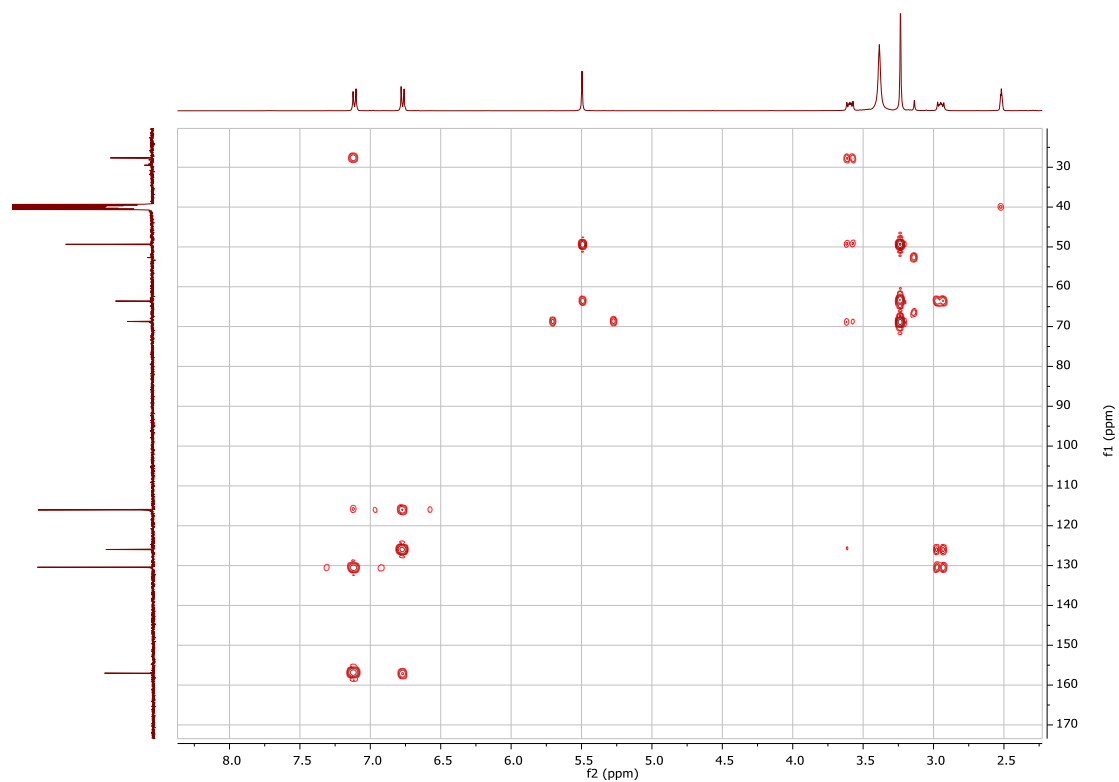

**Figure S17:** HMBC spectrum of compound 5

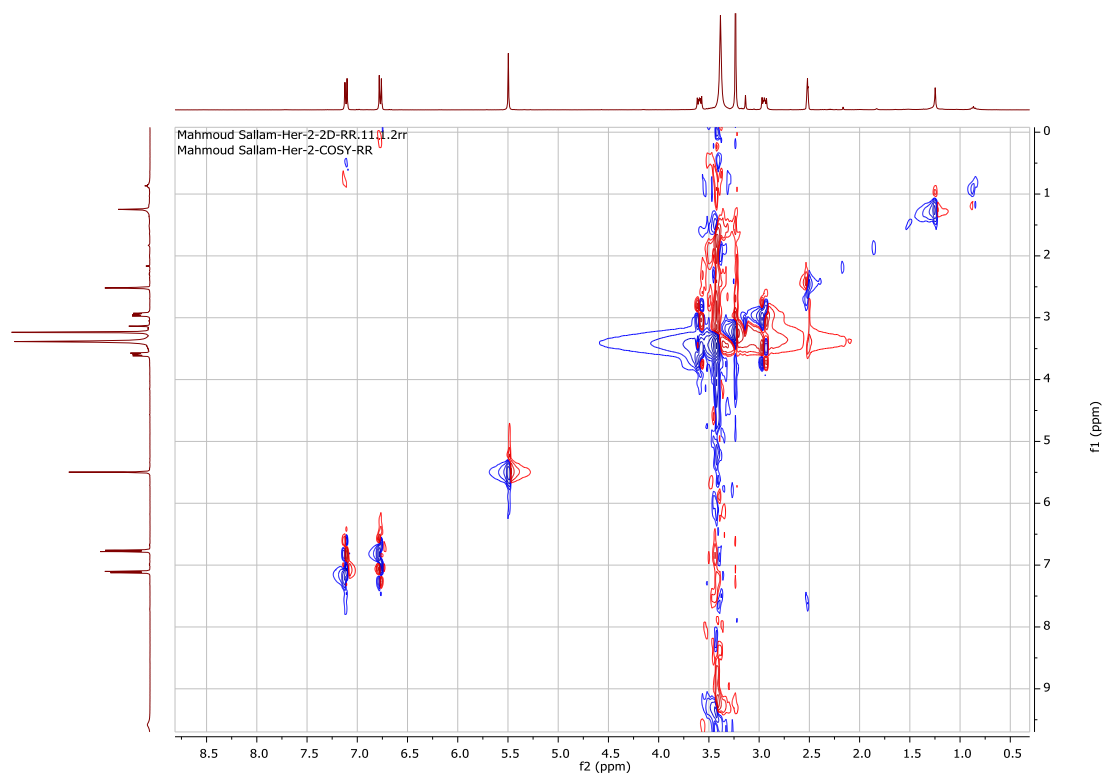

**Figure S18:** COSY spectrum of compound 5

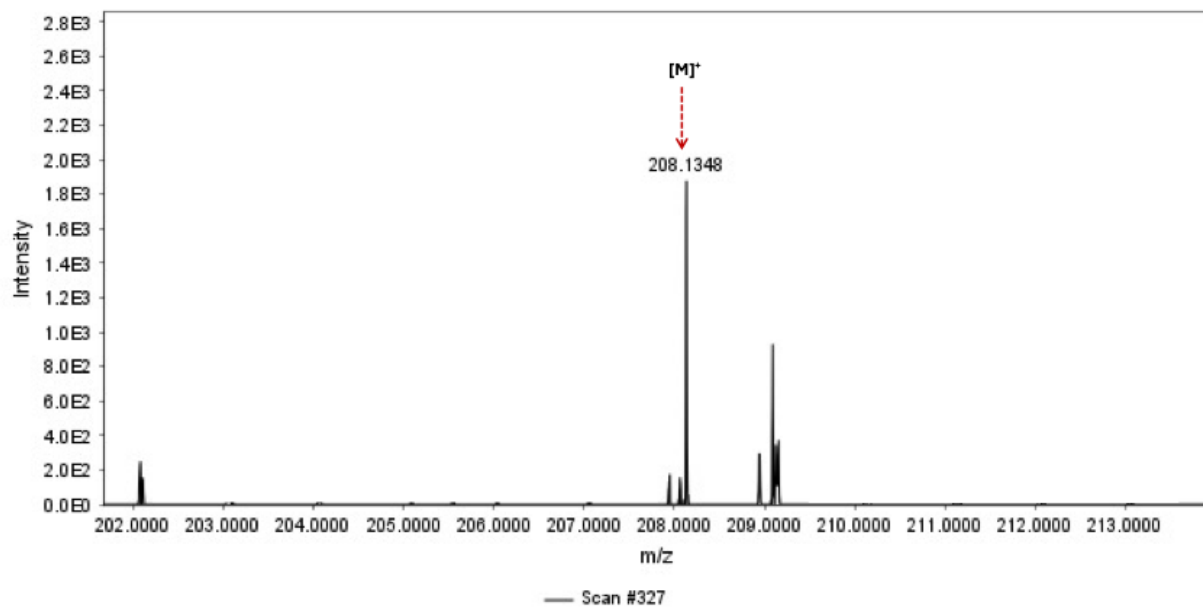

Figure S19: HR-MS spectrum of compound 6

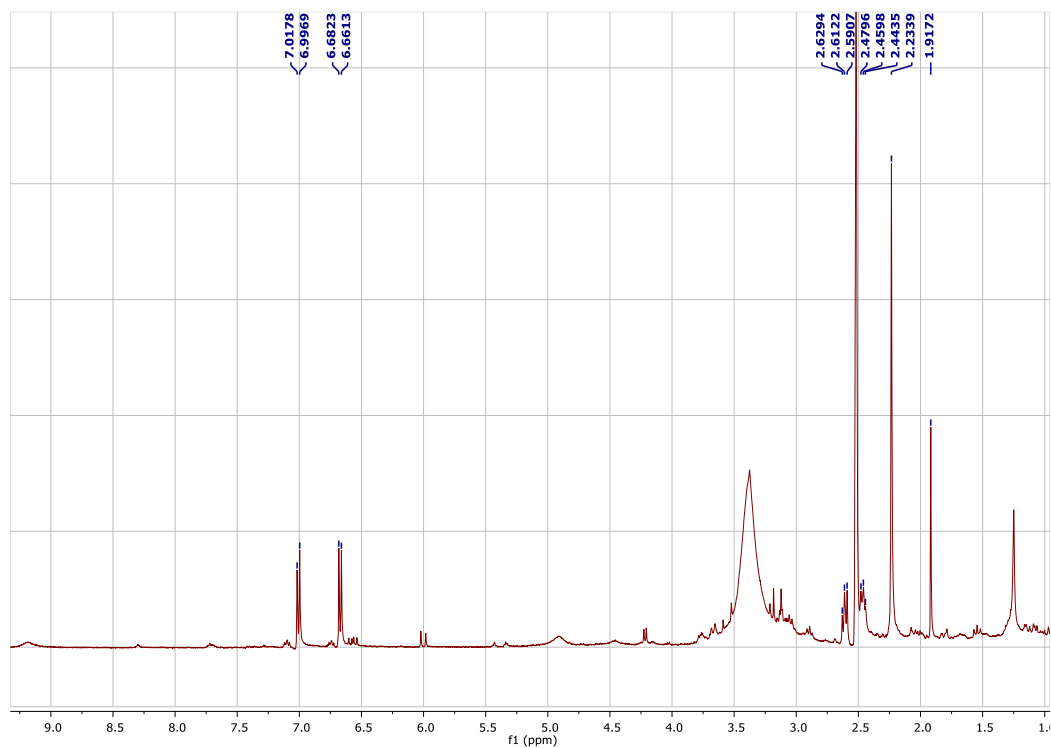

Figure S20:  $^1\text{H}$  NMR spectrum of compound 6

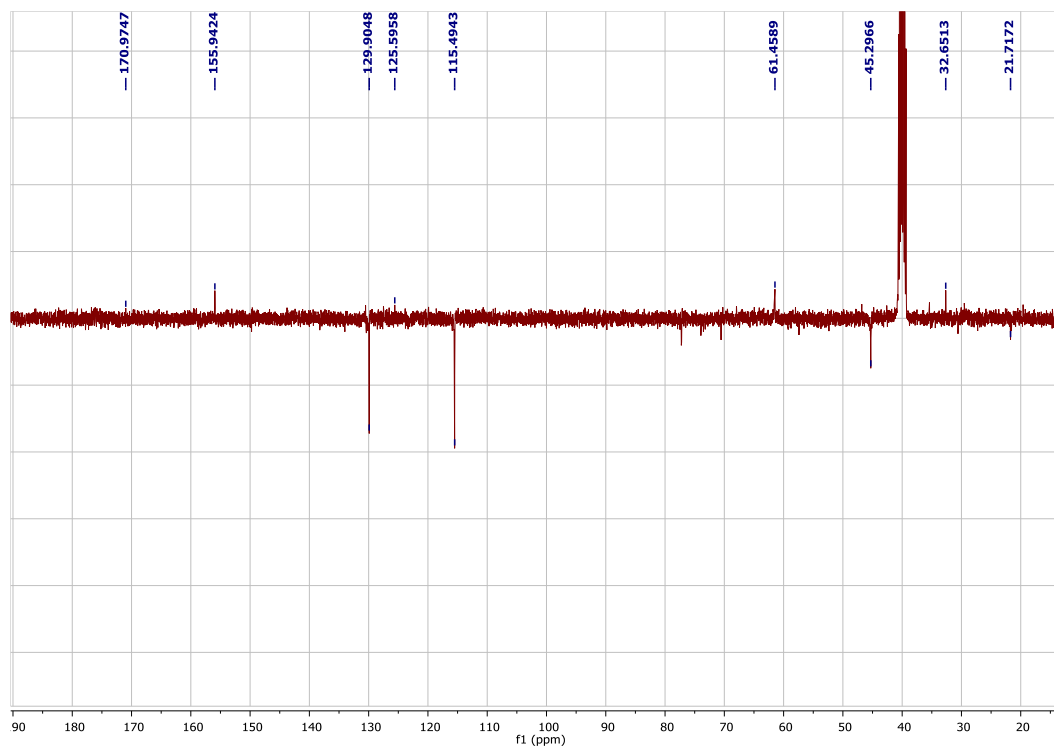

**Figure S21:** APT spectrum of compound 6

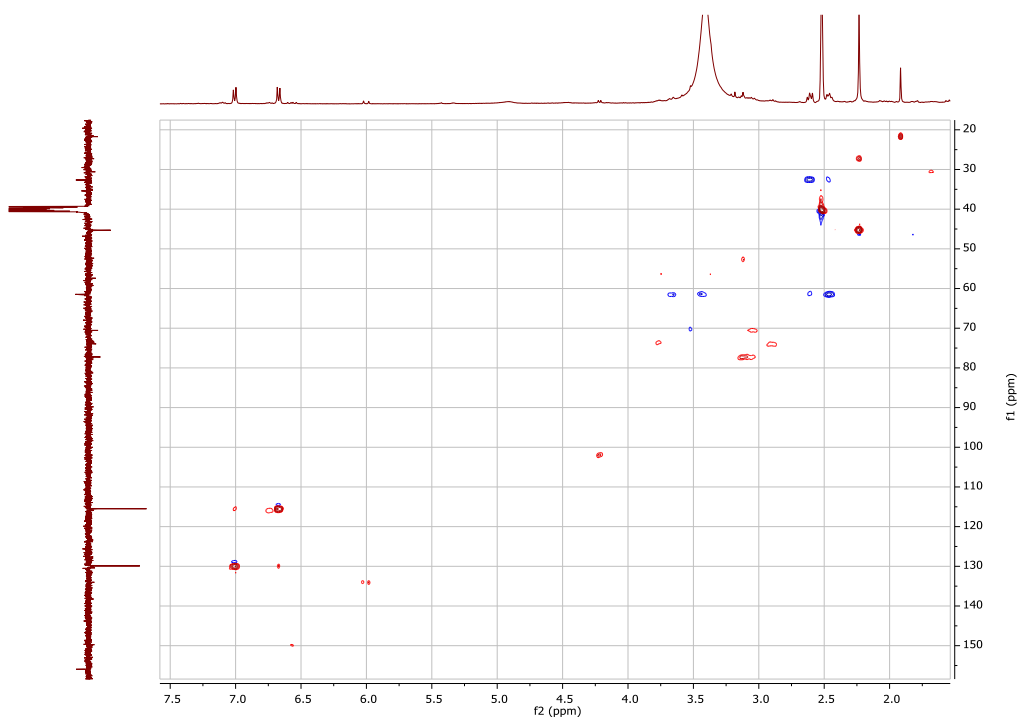

**Figure S22:** HSQC spectrum of compound 6

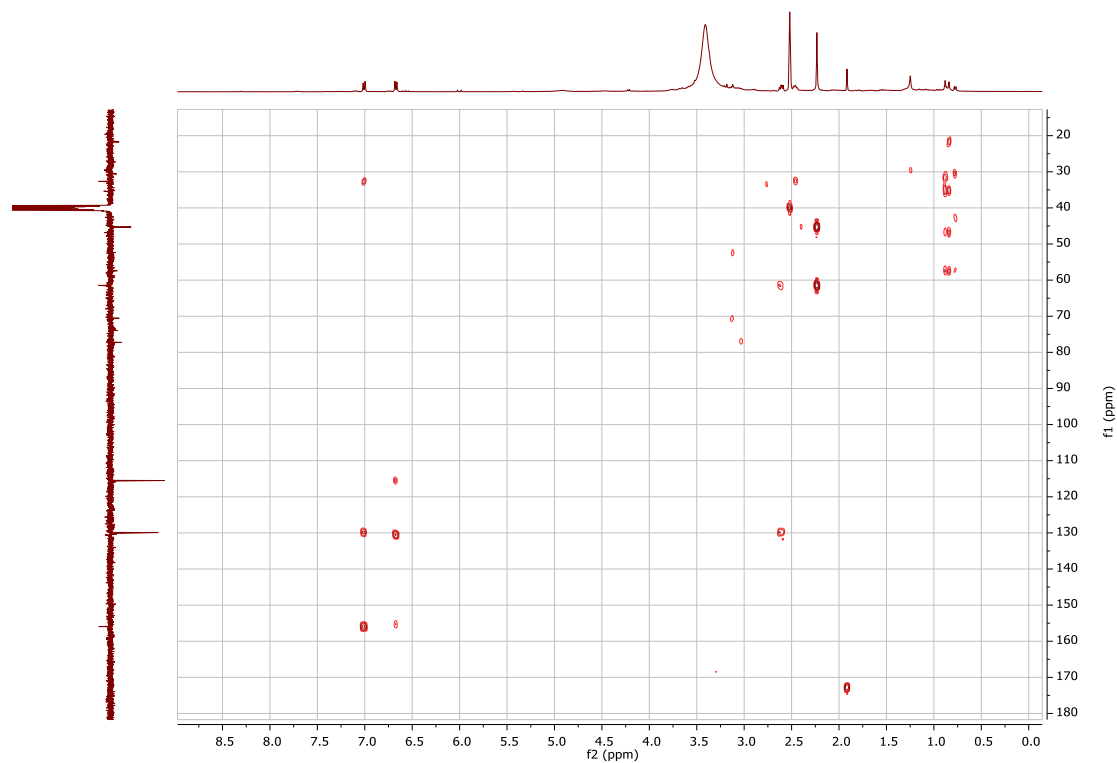

**Figure S23:** HMBC spectrum of compound 6

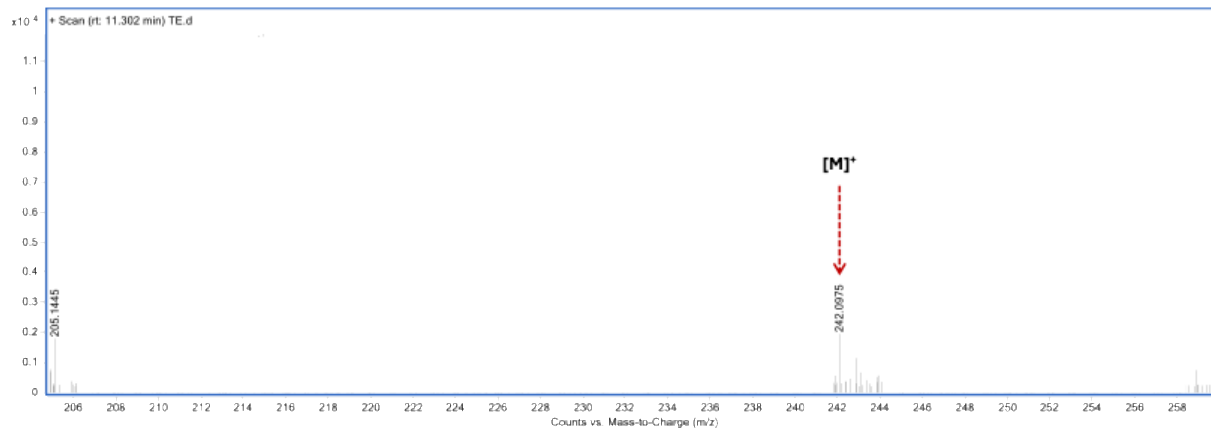

**Figure S24:** HR-MS spectrum of compound 7

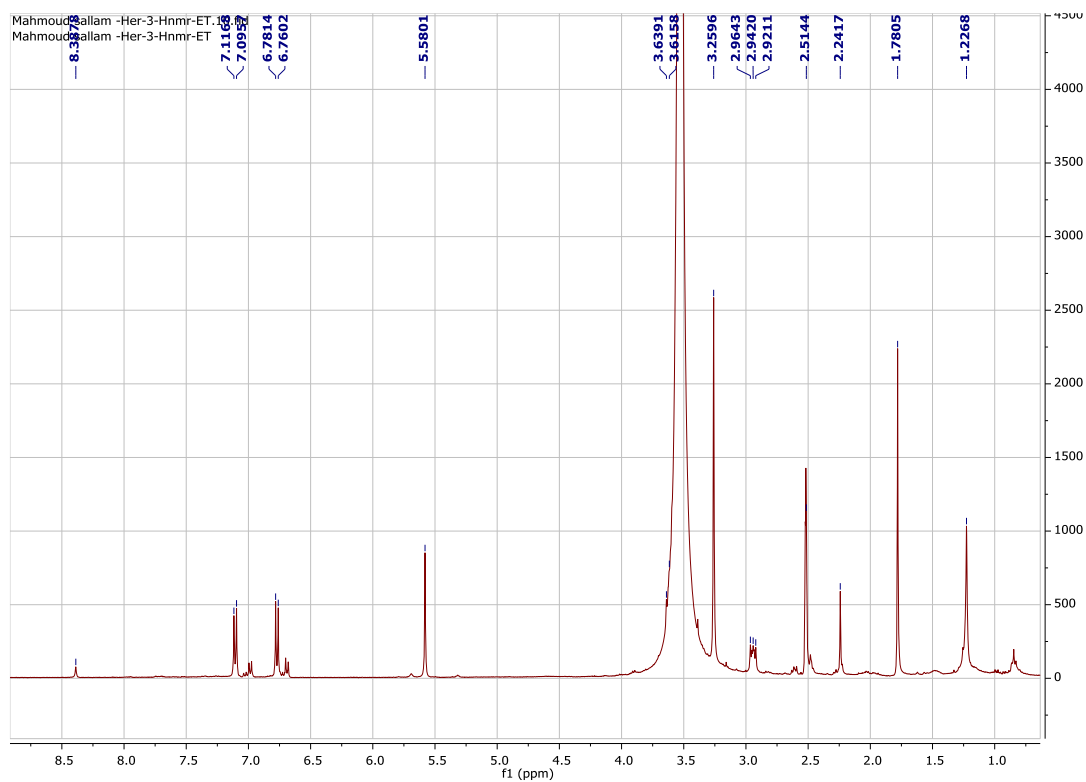

**Figure S25:**  $^1\text{H}$  NMR spectrum of compound 7

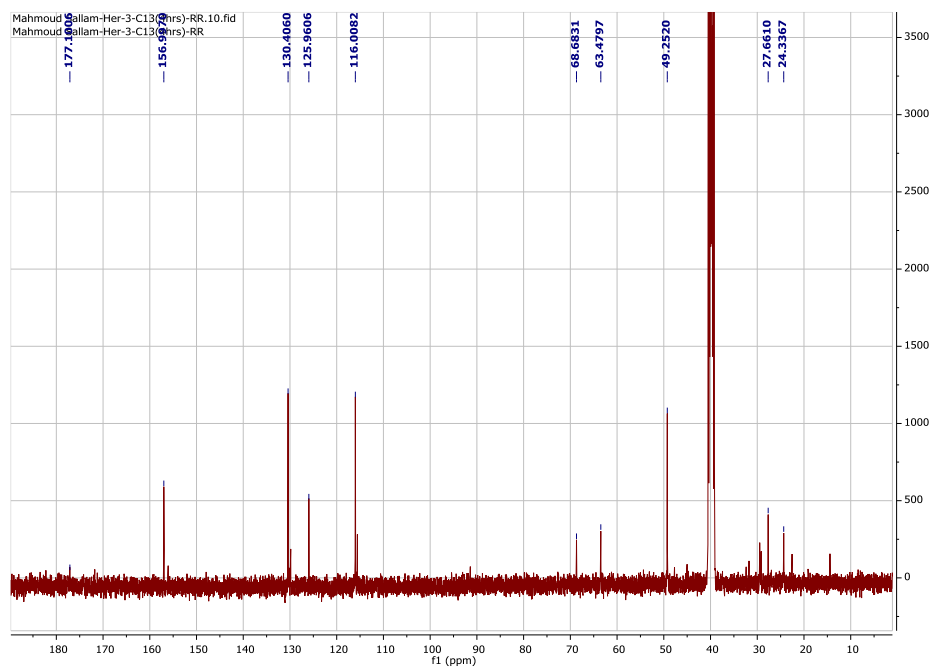

**Figure S26:**  $^{13}\text{C}$  NMR spectrum of compound 7

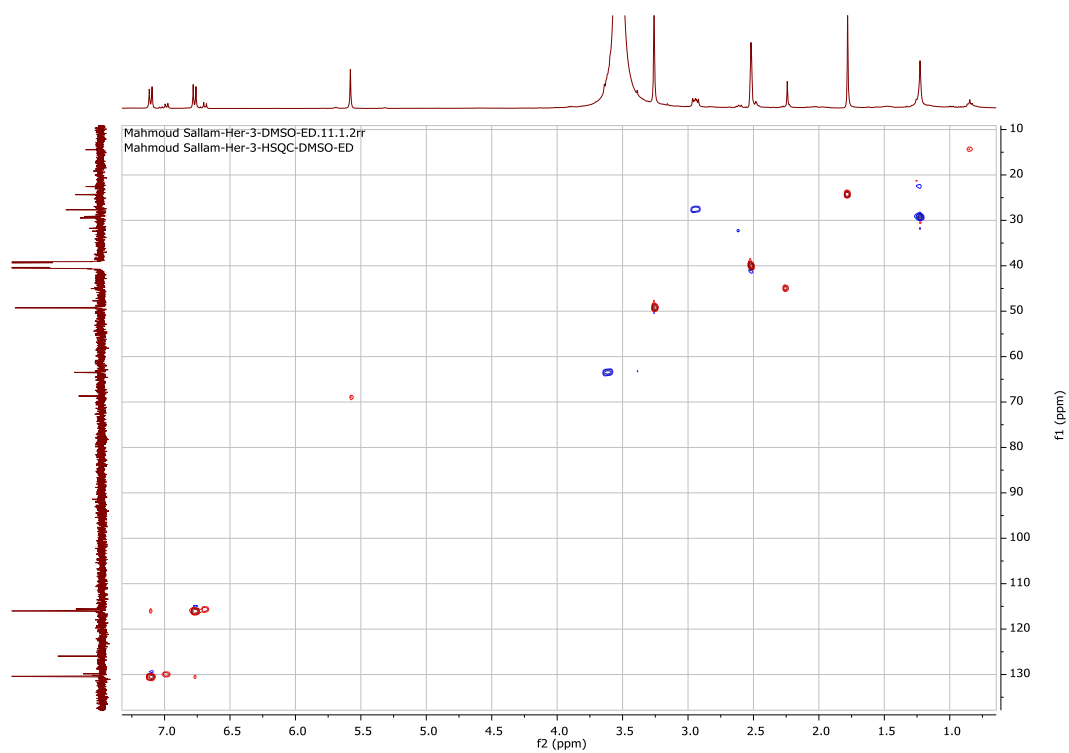

**Figure S27:** HSQC spectrum of compound 7



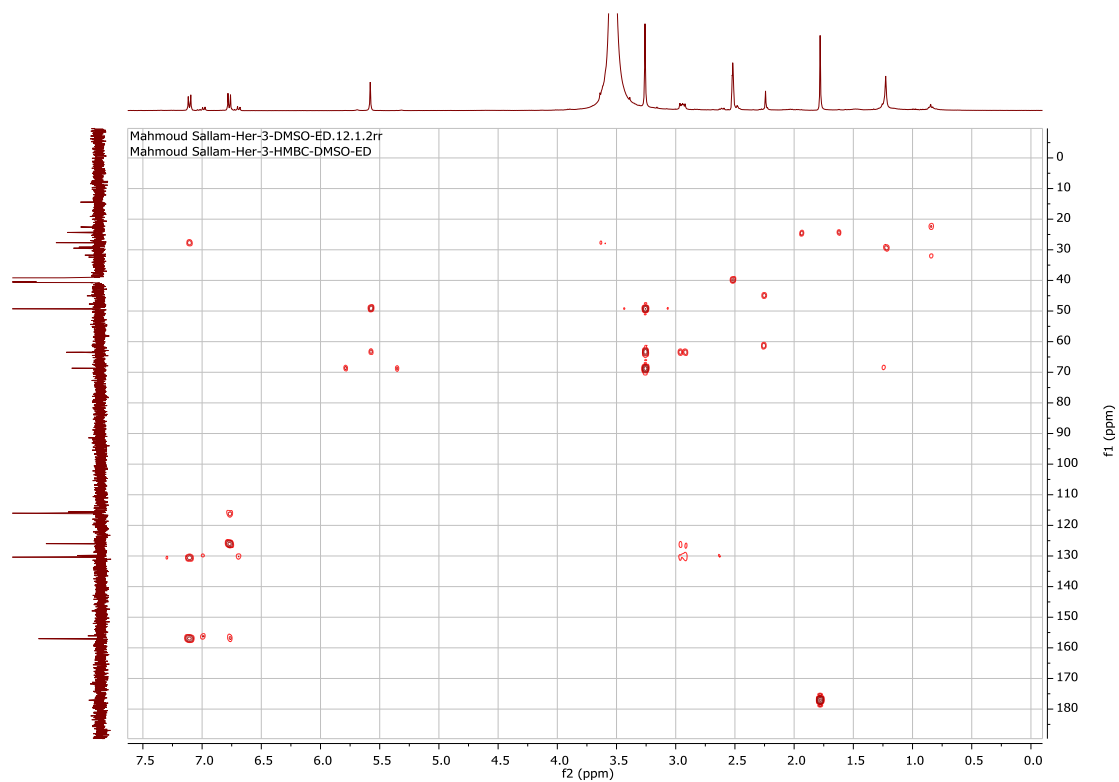

**Figure S28:** HMBC spectrum of compound 7

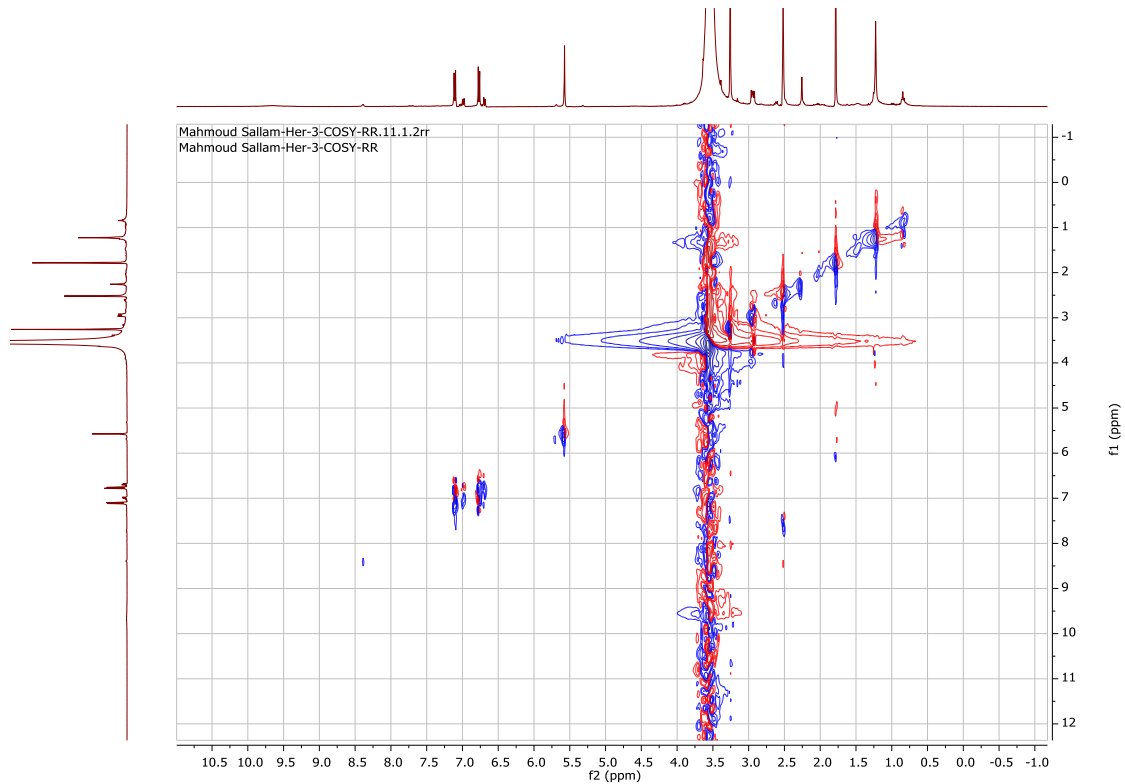

**Figure S29:** COSY spectrum of compound 7
